# Supplementary material
Source: Springer Nature journal article supplement (https://www.springermedizin.de/resource/supplementary/12889_2008_1375_MOESM1_ESM.pdf/9503070)

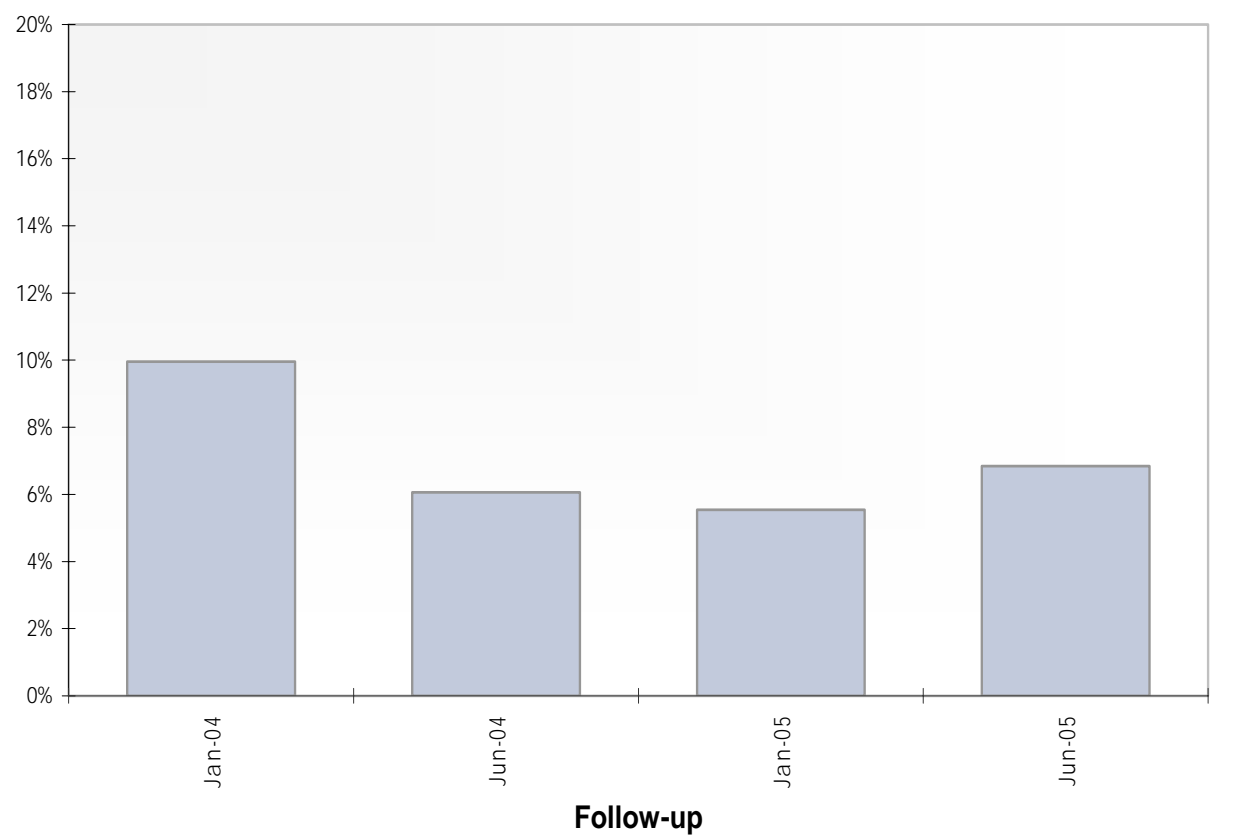

Supplement: MOESM1 [file 9503070]
